# Supplementary material for: Mid-Holocene thinning of David Glacier, Antarctica: chronology and controls
Source: Copernicus journal article supplement (doi:10.5194/tc-15-5447-2021), 2021-12-07
Supplement: Supplementary file 1 [file tc-15-5447-2021-supplement.zip]

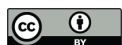

*Supplement of*

**Mid-Holocene thinning of David Glacier, Antarctica:  
chronology and controls**

**Jamey Stutz et al.**

*Correspondence to:* Jamey Stutz ([jamey.stutz@vuw.ac.nz](mailto:jamey.stutz@vuw.ac.nz))

- [tc-15-5447-2021-supplement-title-page.pdf](#)
- [Supplement.pdf](#)
- [upp-tables-1-5.xlsx](#)

The copyright of individual parts of the supplement might differ from the article licence.
